# Supplementary material
Source: publisher site journal article supplement (https://www.dovepress.com/article/240809)
Supplement: Supplementary file 1 [file get_supplementary_file.php]

**Supplemental Table.** Risk factors of 28-day crude mortality.

| Variable | Patient number (%) | | | |  | Univariate analysis | |  | | | Multivariate analysis | |
| --- | --- | --- | --- | --- | --- | --- | --- | --- | --- | --- | --- | --- |
|  | | Death  n=51 | Survival, n=207 |  | | OR (95% CI) | P value | |  | Adjusted OR (95% CI) | | P value |
| Nursing-home residents | | 5 (9.8) | 6 (2.9) |  | | 3.64 (1.07 – 12.45) | 0.04 | |  | 1.37 (0.25 – 7.68) | | 0.72 |
| Abscess occurrences | | 8 (15.7) | 71 (34.3) |  | | 0.36 (0.16 – 0.80) | 0.01 | |  | 0.73 (0.28 – 1.95) | | 0.53 |
| Pitt bacteremia score ≥ 4 points at onset | | 35 (68.6) | 31 (15.0) |  | | 12.42 (6.14 – 25.11) | <0.001 | |  | 9.07 (3.87 – 21.26) | | <0.001 |
| Delayed administration of appropriate antimicrobials ≥3 days | | 7 (13.7) | 6 (2.9) |  | | 5.33 (1.71 – 16.63) | 0.002 | |  | 6.36 (1.15 – 35.26) | | 0.03 |
| Sources of bacteremia | |  |  |  | |  |  | |  |  | |  |
| Pneumonia | | 30 (58.8) | 29 (14.0) |  | | 8.77 (4.43 – 17.34) | <0.001 | |  | 5.36 (2.29 – 12.53) | | <0.001 |
| Urinary tract infections | | 3 (5.9) | 48 (23.2) |  | | 0.21 (0.06 – 0.69) | 0.005 | |  | 0.38 (0.09 – 1.62) | | 0.19 |
| Fatal comorbidities (McCabe classification) | | 27 (52.9) | 49 (23.7) |  | | 3.63 (1.92 – 6.86) | <0.001 | |  | 4.99 (2.121 – 11.85) | | <0.001 |
| Comorbid diabetes mellitus | | 15 (29.4) | 94 (45.4) |  | | 0.50 (0.26 – 0.97) | 0.04 | |  | 0.39 (0.16 – 1.00) | | 0.05 |

CI = confidence interval; OR = odds ratio.
